# Supplementary material for: The Influence of Sonication Processing Conditions on Electrical and Mechanical Properties of Single and Hybrid Epoxy Nanocomposites Filled with Carbon Nanoparticles
Source: MDPI journal article supplement (doi:10.3390/polym13234128), 2021-11-26
Supplement: s1 [file s1]

# Supplementary Material

**Figure S1.** FTIR spectra for all samples. Dashed lines at 1712 cm<sup>-1</sup> highlight the characteristic ketone band.

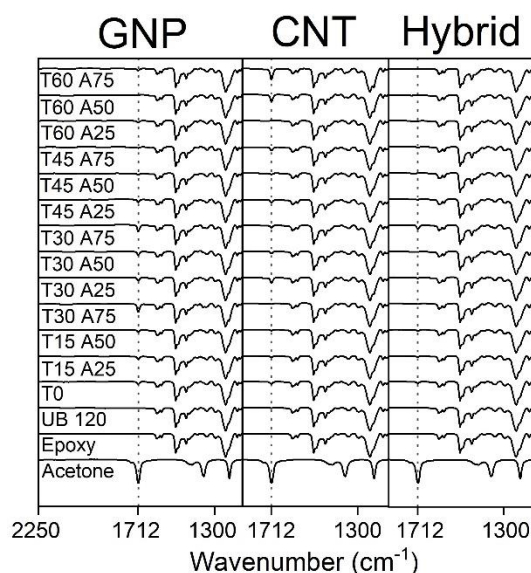

**Table S1.** Total acoustic energy delivered during sonication and results for each property tested. Processing parameters are denoted in samples' names: minutes of processing time after letter "T", and amplitude (%) after letter "A". "UB" stands for ultrasonic bath.

| Sample           | Acoustic energy (J) | $\sigma_{AC}$ (S·m <sup>-1</sup> ) | E' at 40 °C (MPa)  | T <sub>g</sub> (°C) |
|------------------|---------------------|------------------------------------|--------------------|---------------------|
| Neat epoxy       | 0                   | $(4.5 \pm 2.9) \times 10^{-12}$    | $1631.4 \pm 91.8$  | $138.1 \pm 0.1$     |
| GNP 2.5% T0      | 0                   | $(2.1 \pm 0.5) \times 10^{-10}$    | $2648.7 \pm 150.9$ | $124.6 \pm 1.8$     |
| GNP 2.5% T120 UB | 3828                | $(5.6 \pm 4.5) \times 10^{-7}$     | $2761.8 \pm 69.4$  | $134.1 \pm 0.9$     |
| GNP 2.5% T15 A25 | 5700                | $(6.8 \pm 1.5) \times 10^{-10}$    | $2558.8 \pm 50.0$  | $126.4 \pm 0.91$    |
| GNP 2.5% T30 A25 | 12420               | $(5.8 \pm 1.3) \times 10^{-11}$    | $2603.1 \pm 320.6$ | $135.6 \pm 0.13$    |
| GNP 2.5% T45 A25 | 18500               | $(5.9 \pm 4.4) \times 10^{-10}$    | $2731.8 \pm 278.5$ | $130.0 \pm 0.3$     |
| GNP 2.5% T60 A25 | 25025               | $(2.9 \pm 2.2) \times 10^{-10}$    | $2709.8 \pm 90.3$  | $139.0 \pm 1.3$     |
| GNP 2.5% T15 A50 | 21450               | $(7.0 \pm 2.3) \times 10^{-11}$    | $2782.6 \pm 95.8$  | $128.2 \pm 0.4$     |
| GNP 2.5% T30 A50 | 43460               | $(3.6 \pm 0.9) \times 10^{-11}$    | $2751.1 \pm 186.9$ | $123.2 \pm 2.1$     |
| GNP 2.5% T45 A50 | 64530               | $(3.8 \pm 1.4) \times 10^{-11}$    | $2909.0 \pm 48.2$  | $126.5 \pm 0.8$     |
| GNP 2.5% T60 A50 | 87170               | $(1.7 \pm 0.7) \times 10^{-11}$    | $2849.2 \pm 12.2$  | $131.3 \pm 0.4$     |
| GNP 2.5% T15 A75 | 48100               | $(7.6 \pm 1.2) \times 10^{-11}$    | $2693.9 \pm 301.2$ | $105.8 \pm 2.5$     |
| GNP 2.5% T30 A75 | 90980               | $(4.8 \pm 0.7) \times 10^{-11}$    | $2324.2 \pm 233.2$ | $116.2 \pm 1.6$     |
| GNP 2.5% T45 A75 | 132700              | $(2.4 \pm 0.2) \times 10^{-11}$    | $2715.7 \pm 106.5$ | $133.7 \pm 0.1$     |
| GNP 2.5% T60 A75 | 171000              | $(2.0 \pm 0.3) \times 10^{-11}$    | $2654.3 \pm 153.3$ | $133.3 \pm 2.2$     |
| CNT 0.25% T0     | 0                   | $(1.1 \pm 0.9) \times 10^{-4}$     | $2554.8 \pm 133.1$ | $132.1 \pm 0$       |

|                      |        |                                |                    |                 |
|----------------------|--------|--------------------------------|--------------------|-----------------|
| CNT 0.25% 120 UB     | 3828   | $(1.6 \pm 1.3) \times 10^{-5}$ | $2346.6 \pm 81.7$  | $133.4 \pm 0.9$ |
| CNT 0.25% T15 A25    | 5700   | $(1.3 \pm 0.1) \times 10^{-3}$ | $2248.8 \pm 5.9$   | $128.8 \pm 1.4$ |
| CNT 0.25% T30 A25    | 12420  | $(1.1 \pm 0.1) \times 10^{-3}$ | $2387.0 \pm 15.7$  | $131.7 \pm 0.7$ |
| CNT 0.25% T45 A25    | 18500  | $(1.4 \pm 0.1) \times 10^{-3}$ | $2230.8 \pm 52.3$  | $114.7 \pm 0.3$ |
| CNT 0.25% T60 A25    | 25025  | $(1.4 \pm 0.2) \times 10^{-3}$ | $2457.6 \pm 40.7$  | $128.3 \pm 0.3$ |
| CNT 0.25% T15 A50    | 21450  | $(6.5 \pm 0.4) \times 10^{-4}$ | $2241.4 \pm 74.1$  | $132.0 \pm 0.8$ |
| CNT 0.25% T30 A50    | 43460  | $(2.3 \pm 0.4) \times 10^{-4}$ | $2167.1 \pm 91.0$  | $110.2 \pm 1.2$ |
| CNT 0.25% T45 A50    | 64530  | $(1.5 \pm 0.1) \times 10^{-4}$ | $1770.7 \pm 25.98$ | $100.1 \pm 0.9$ |
| CNT 0.25% T60 A50    | 87170  | $(1.2 \pm 0.2) \times 10^{-4}$ | $1878.2 \pm 85.7$  | $82.9 \pm 0.5$  |
| CNT 0.25% T15 A75    | 48100  | $(1.6 \pm 0.6) \times 10^{-3}$ | $2386.6 \pm 82.0$  | $122.8 \pm 0.5$ |
| CNT 0.25% T30 A75    | 90980  | $(5.2 \pm 1.4) \times 10^{-4}$ | $2348.2 \pm 22.4$  | $121.3 \pm 0.8$ |
| CNT 0.25% T45 A75    | 132700 | $(3.8 \pm 0.6) \times 10^{-4}$ | $2292.2 \pm 5.7$   | $116.7 \pm 1.8$ |
| CNT 0.25% T60 A75    | 171000 | $(3.3 \pm 0.4) \times 10^{-4}$ | $2287.3 \pm 112.6$ | $112.5 \pm 0.3$ |
| HB 2.5/0.25% T0      | 0      | $(4.2 \pm 3.6) \times 10^{-5}$ | $2931.4 \pm 170.2$ | $133.5 \pm 1.0$ |
| HB 2.5/0.25% T120 UB | 3828   | $(6.7 \pm 3.1) \times 10^{-4}$ | $2660.2 \pm 353.4$ | $136.1 \pm 2.8$ |
| HB 2.5/0.25% T15 A25 | 5700   | $(1.3 \pm 1.2) \times 10^{-3}$ | $2672.3 \pm 165.8$ | $137.5 \pm 1.3$ |
| HB 2.5/0.25% T30 A25 | 12420  | $(5.9 \pm 2.3) \times 10^{-5}$ | $2719.3 \pm 487.7$ | $134.8 \pm 0.4$ |
| HB 2.5/0.25% T45 A25 | 18500  | $(1.3 \pm 0.8) \times 10^{-3}$ | $2659.1 \pm 13.7$  | $135.9 \pm 1.2$ |
| HB 2.5/0.25% T60 A25 | 25025  | $(4.6 \pm 2.5) \times 10^{-4}$ | $2994.5 \pm 3.6$   | $137.9 \pm 0.5$ |
| HB 2.5/0.25% T15 A50 | 21450  | $(5.7 \pm 0.2) \times 10^{-6}$ | $2589.7 \pm 223.8$ | $133.4 \pm 0.7$ |
| HB 2.5/0.25% T30 A50 | 43460  | $(3.2 \pm 0.2) \times 10^{-5}$ | $2749.9 \pm 23.9$  | $135.1 \pm 0.3$ |
| HB 2.5/0.25% T45 A50 | 64530  | $(9.9 \pm 7.0) \times 10^{-6}$ | $2839 \pm 180.7$   | $138.4 \pm 0.0$ |
| HB 2.5/0.25% T60 A50 | 87170  | $(6.0 \pm 0.6) \times 10^{-6}$ | $2817.5 \pm 1.8$   | $140.3 \pm 1.1$ |
| HB 2.5/0.25% T15 A75 | 48100  | $(1.3 \pm 0.3) \times 10^{-5}$ | $2850.7 \pm 60.6$  | $132.6 \pm 0.9$ |
| HB 2.5/0.25% T30 A75 | 90980  | $(1.2 \pm 0.9) \times 10^{-5}$ | $2492.5 \pm 246.5$ | $119.7 \pm 1.0$ |
| HB 2.5/0.25% T45 A75 | 132700 | $(7.3 \pm 2.7) \times 10^{-6}$ | $2707.1 \pm 79.7$  | $134.3 \pm 1.4$ |
| HB 2.5/0.25% T60 A75 | 171000 | $(8.9 \pm 4.2) \times 10^{-6}$ | $2824.0 \pm 12.0$  | $136.4 \pm 0.5$ |
